# Supplementary material for: Immunological gadolinium-doped mesoporous carbon nanoparticles for tumor-targeted MRI and photothermal-immune co-therapy
Source: Royal Society of Chemistry journal article supplement (doi:10.1039/d3tb00595j), 2023-01-01
Supplement: d3tb00595j1.pdf [file d3tb00595j1.pdf]

1 **Immunological gadolinium doped mesoporous carbon nanoparticles**  
2 **for tumor-targeted MRI and photothermal-immune co-therapy**

3 *Xiaoxi Song<sup>1,2</sup>, Chun Zhang<sup>1,2</sup>, Mengyuan Xing<sup>1</sup>, Chunyan He<sup>1</sup>, Dongxu Wang<sup>1</sup>, Lijuan*  
4 *Chong<sup>1,2</sup>, Xiuli Zhang<sup>1,2</sup>, Minghui Chen<sup>1,2,\*</sup>, Jingjing Li<sup>1,2,\*</sup>*

5 <sup>1</sup>School of Medical Imaging, Xuzhou Medical University, Xuzhou, Jiangsu 221004,  
6 China

7 <sup>2</sup>Department of Radiology, Affiliated Hospital of Xuzhou Medical University, Xuzhou  
8 221006, China

9 \*Corresponding authors: Minghui Chen (Email: [minghui@xzhmu.edu.cn](mailto:minghui@xzhmu.edu.cn))

10 Jingjing Li (Email: [qingchao0124@163.com](mailto:qingchao0124@163.com))

## 11 **1. MATERIALS AND METHODS**

### 12 *1.1 Purification of Extracellular vesicle*

13 Extracellular vesicle were purified using differential ultracentrifugation method  
14 [33, 34]. Firstly, FBS used for cell incubation was centrifuged at 100,000 g to wipe out  
15 the existing exosomes. 4T1 cells were incubated in exosome-free DME/F-12 medium  
16 for 48 h. Then, the cell culture mediums were centrifuged at 1000 g for 10 min, 10,000  
17 g for 30 min and 100,000 g for 1 h to get the pellet. After washed with PBS, the purified  
18 extracellular vesicle was obtained by another centrifugation at 100,000 g for 1 h.

### 19 *1.2 Cell Culture and Animals*

20 NIH-3T3 mouse embryonic fibroblast cells and 4T1 mouse breast cancer cells  
21 were obtained from Chinese Academy of Sciences Cell Bank (Shanghai, China). The  
22 above cell lines were cultured in DMEM and DMEM/F-12 medium containing 10 %  
23 FBS and 100 U/mL penicillin – streptomycin, respectively. The cells culture condition  
24 was incubating in 5 % CO<sub>2</sub> atmosphere at 37 °C.

25 18-20 g of female BALB/c mice were purchased from Xuzhou Medical  
26 University. All involving experimental animals were approved by the Animal Care  
27 Committee of Xuzhou Medical University and carried out in compliance with the  
28 Guidelines.

### 29 *1.3 Evaluation of the Tumor Inhibition In Vivo*

30 The established 4T1 tumor-bearing mice were randomly allocated into 6 groups  
31 and were received with PBS, NIR, EV@Gd-MCNs-R837, Gd-MCNs + NIR, Gd-  
32 MCNs-R837 + NIR and EV@Gd-MCNs-R837 + NIR treatments (n = 3), respectively.  
33 For the NIR, Gd-MCNs + NIR, Gd-MCNs-R837 + NIR and EV@Gd-MCNs-R837 +  
34 NIR groups, the tumors of mice were irradiated under an 808 nm laser (1 W/cm<sup>2</sup>) for 5  
35 min at 4 h post-injection. The tumor volumes were measured every other day (tumor  
36 volume (mm<sup>3</sup>) = length × width<sup>2</sup>/2). At the final stage of the experiment, mice were  
37 sacrificed, and the tumors were extracted.

### 38 *1.4 Long-Term Immune Memory Effect*

39 The established 4T1 tumor-bearing mice were randomly allocated into 6 groups  
40 and were received with PBS, NIR, EV@Gd-MCNs-R837, Gd-MCNs+NIR, Gd-MCNs-

41 R837+NIR and EV@Gd-MCNs-R837+NIR treatments on day -35 (n = 3). Four hours  
42 later, mice in the NIR, Gd-MCNs + NIR, Gd-MCNs-R837 + NIR and EV@Gd-MCNs-  
43 R837 + NIR groups were irradiated using an 808 nm laser (1 W/cm<sup>2</sup>) for 5 min. Surgical  
44 excision was performed to remove the remaining tumors one week after the treatment.  
45 Four weeks later, mice were reinoculated with 4T1 cancer cells and the volumes of  
46 distant tumors were monitored every other day.

47 For cytokine production analysis, the blood samples were obtained from mice  
48 receiving different treatments. Blood samples were harvested on day 3 after different  
49 treatments. The serum secretion of TNF- $\alpha$  and IL-6 was detected using an ELISA kit  
50 (Solarbio) based on the manufacturer's protocol. The spleen was dissected 7 days after  
51 treatment. Tumors were also harvested on days 1 and 7 after different treatments. The  
52 spleen and tumors were then fixed, embedded in paraffin, sectioned, and  
53 immunostained with anti-mouse CD11c-Alexa Fluor 647 on day 1 after treatment, or  
54 anti-mouse CD8-Alexa Fluor 647 antibody and anti-mouse CD3-APC/Cy7 on day 7  
55 after treatment.

56 During the treatment, if the tumor volume of the mice was more than 2000 mm<sup>3</sup> or  
57 serious complications occurred, the mice would be euthanized according to the  
58 requirements of the Animal Ethics Committee.

### 59 *1.5 Biosafety study*

60 Firstly, MTT assay was introduced to evaluate the cytotoxicity of EV@Gd-MCNs-  
61 R837. In brief, 5 $\times$ 10<sup>3</sup> 4T1 cells or NIH-3T3 cells were cultured into a 96-well plate for  
62 24 h, and then exposed to different concentrations of EV@Gd-MCNs-R837 (0, 20, 40,  
63 60, 80, 100, 150, 200  $\mu$ g/mL) for another 24 h. Then, the cells were processed by MTT  
64 assay to evaluate the cytotoxicity of EV@Gd-MCNs-R837.

65 To evaluate the biosafety of EV@Gd-MCNs-R837 *in vivo*, healthy Balb/c mice  
66 were intravenously injected with EV@Gd-MCNs-R837 (10 mg/kg). The blood sample  
67 of each mouse was collected at determined time points post-injection (1d, 7d and 21d).  
68 Blood samples from mice with saline injection was harvested as control. Then, the  
69 index of WBC, RBC, PLT, HGB, MCV, MCH, MCHC, HCT, ALB, AST, ALT, TP,  
70 Urea and creatinine in the collected blood samples were detection by blood

71 biochemistry examination and blood route test. Furthermore, major organs were also  
72 collected from the sacrificed mice for H&E staining. The images were observed by an  
73 optical microscope.

#### 74 *1.6 Statistical analysis*

75 All results were presented as error bars which represent  $\pm$  standard deviation  
76 (SD). The t-tests were used to evaluate the statistical significance of the differences (*\*P*  
77  $< 0.05$ , *\*\*P*  $< 0.01$ , *\*\*\*P*  $< 0.001$ ).

78

79

80 **2. SUPPLEMENTARY FIGURES**

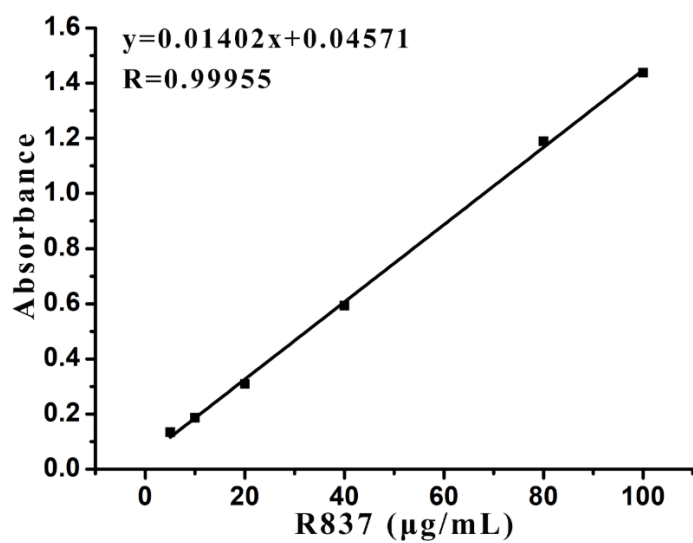

81

82 **Figure S1.** Linear equation of R837 with different concentrations in UV-vis absorbance.

83

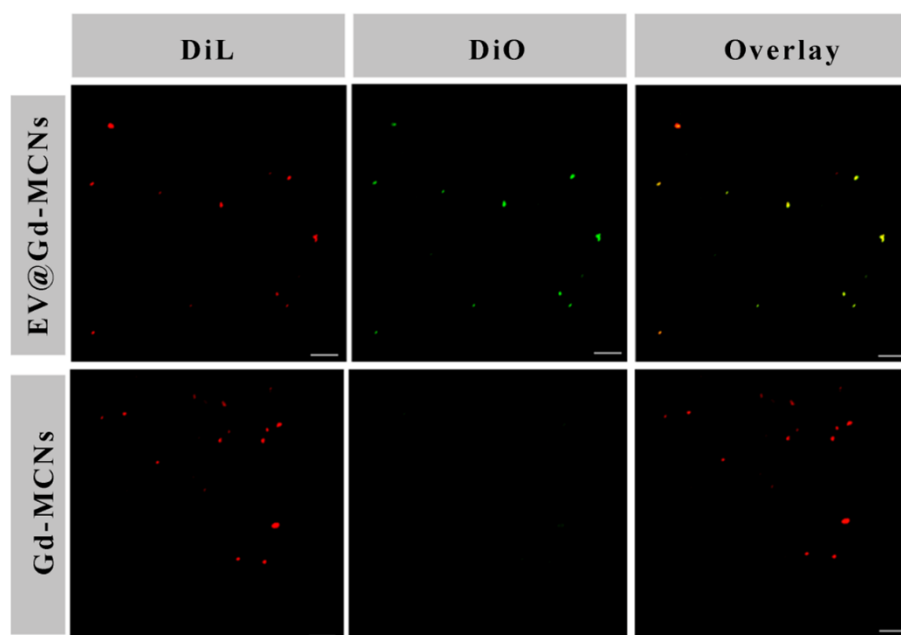

84

85 **Figure S2.** The Colocalization of DiL (red) and DiO (green) in Gd-MCNs and EV@Gd-MCNs by  
86 confocal microscopy.

87

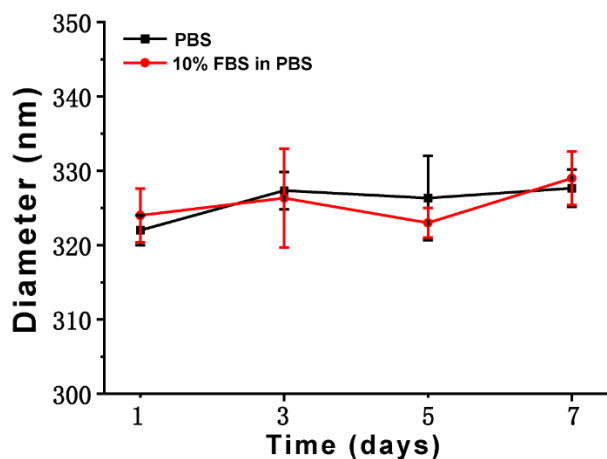

88  
 89 **Figure S3.** The changes of hydrodynamic diameter of EV@Gd-MCNs-R837 in PBS or PBS with  
 90 10 % FBS for 1, 3, 5 and 7 days.

91  
 92

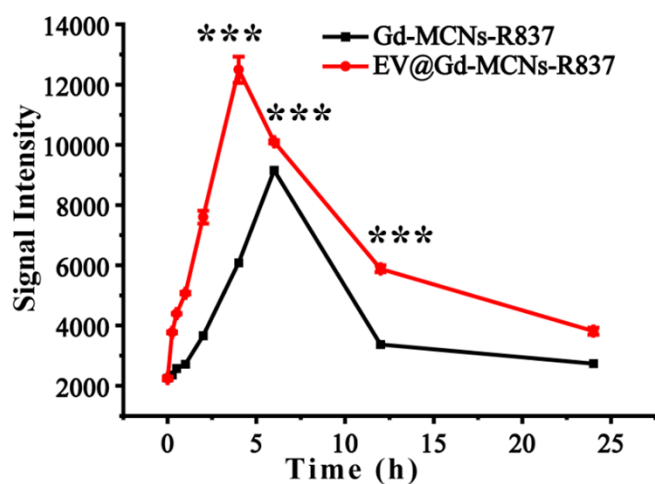

93  
 94 **Figure S4.** The corresponding MRI signal intensity of tumor for Figure 4f.

95  
 96

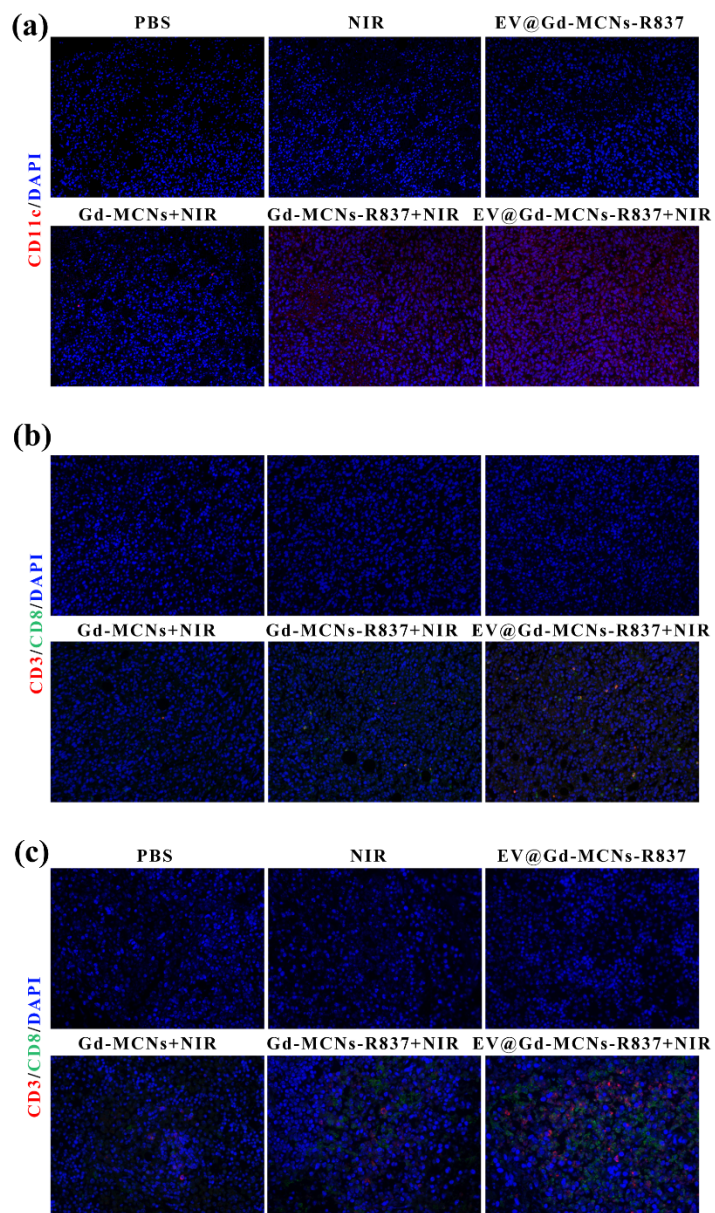

97

98 **Figure S5.** Immunofluorescence staining of different T cell markers (CD11c+, CD3+, CD8+) in **(a)**

99 **(b)** tumor tissue sections and **(c)** spleen tissue sections e after different treatments.

100

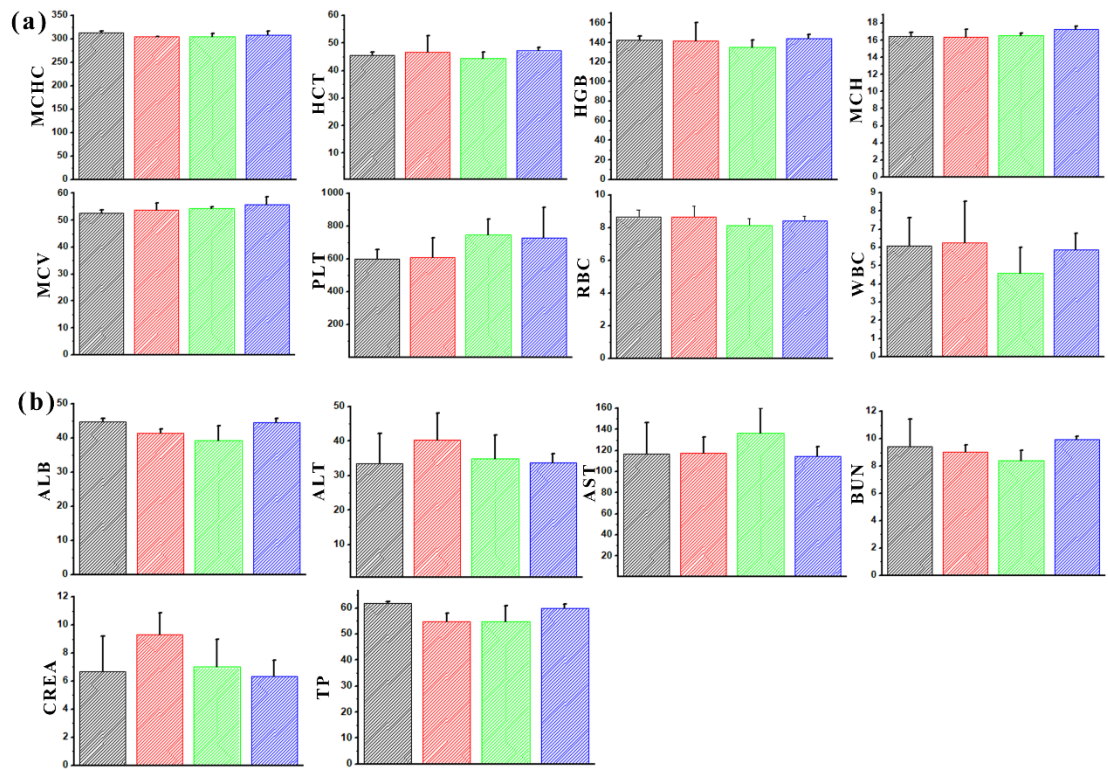

101

102 **Figure S6. (a)** Blood routine and **(b)** blood biochemical analyses of mouse serum during 21 day  
 103 with EV@Gd-MCNs-R837 injection.

104

105



106

107 **Table S1** The loading and encapsulation efficiency of R837 with different amount

| R837 (mg/mL) | Loading efficiency (%) | Encapsulation efficiency (%) |
|--------------|------------------------|------------------------------|
| 0.25         | 15 ± 0.01 %            | 75 ± 0.14 %                  |
| 0.50         | 29 ± 0.01 %            | 87 ± 0.27 %                  |
| 0.75         | 37 ± 0.45 %            | 86 ± 1.15 %                  |
| 1.00         | 42 ± 0.91 %            | 84 ± 1.77 %                  |

108

109

110
